# Supplementary material
Source: PubMed Central journal article supplement (PMC11114704)

**A**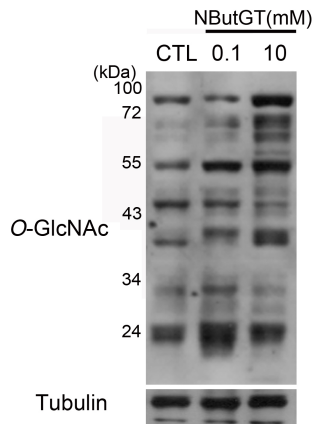**B**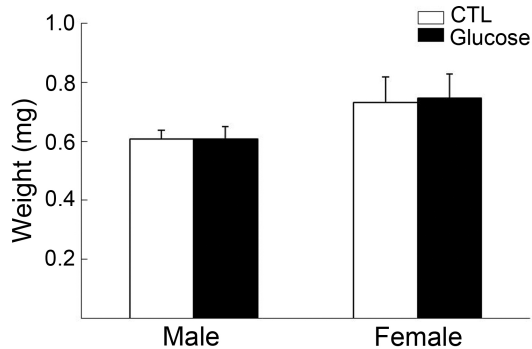**C**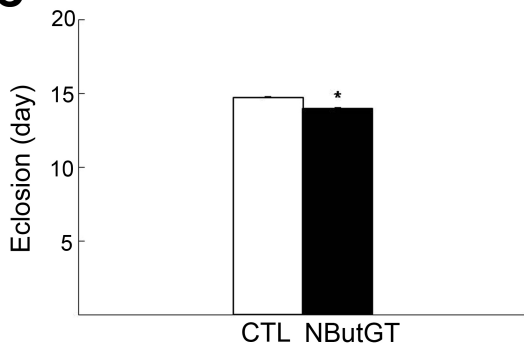**D**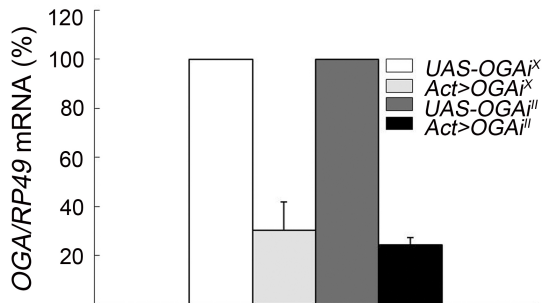

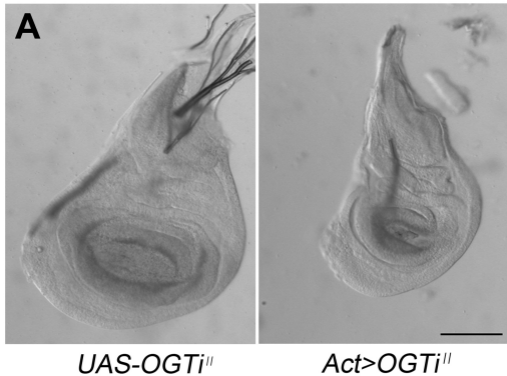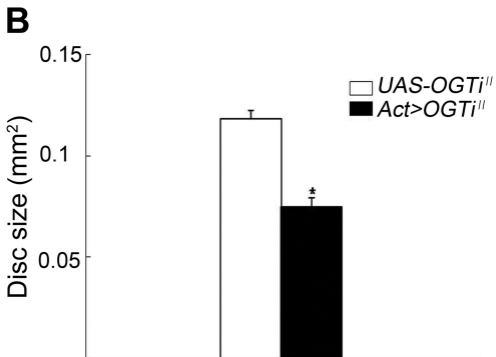

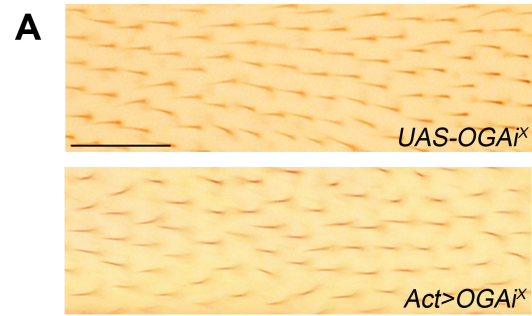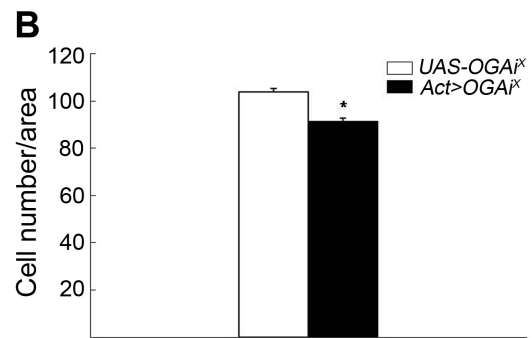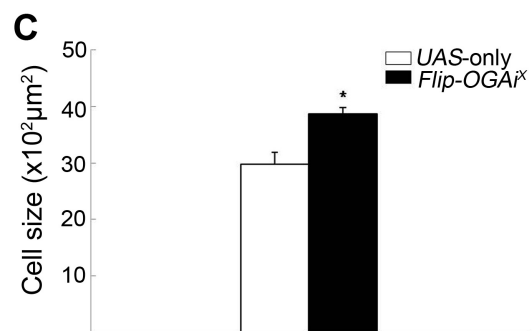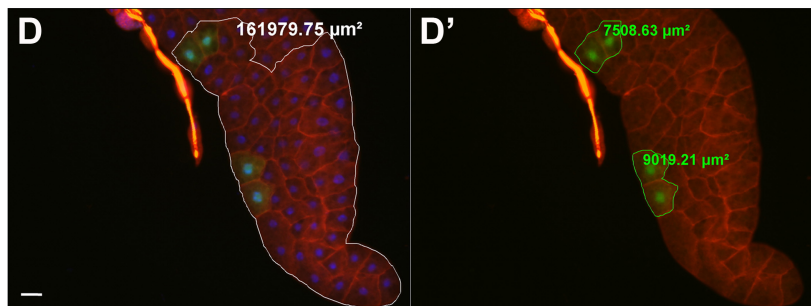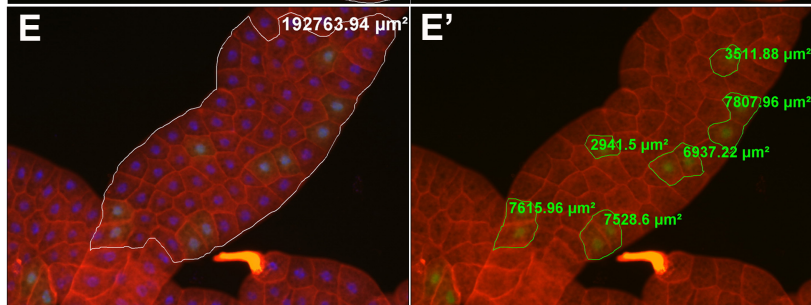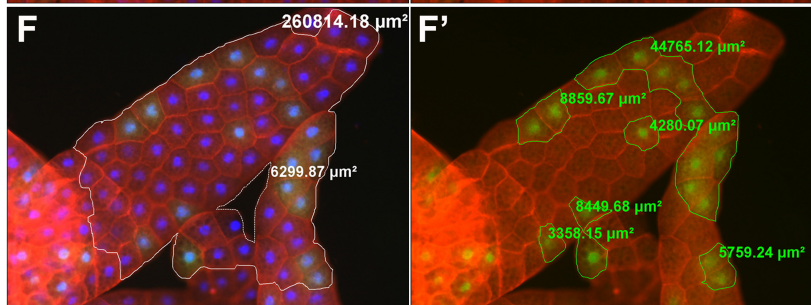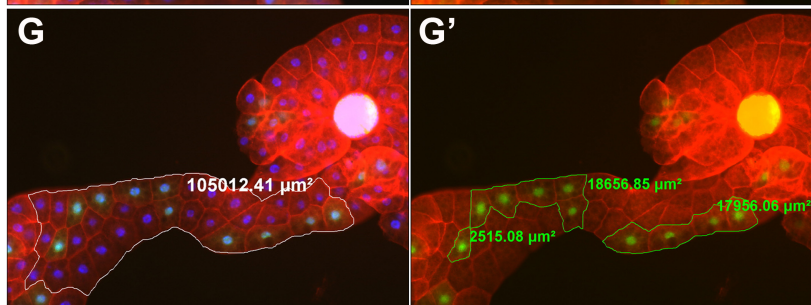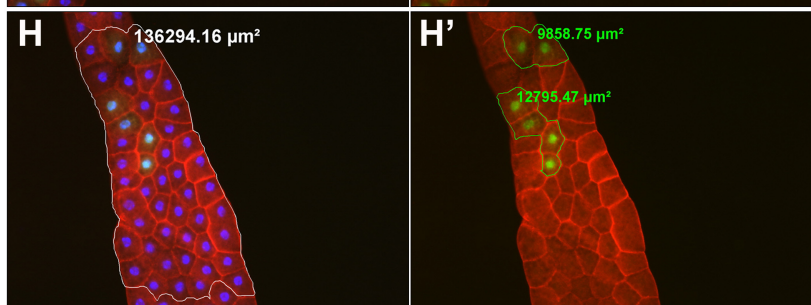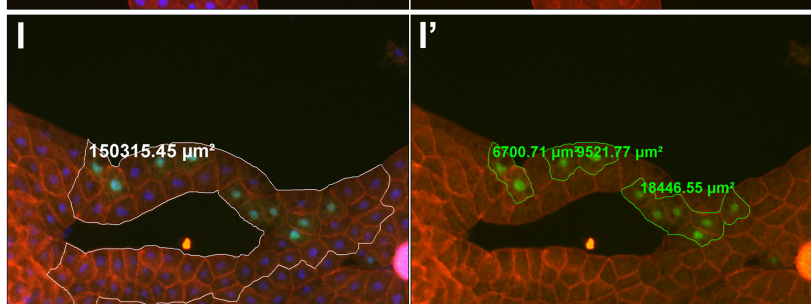

Supplement: 18_2011_640_MOESM2_ESM.pdf [file 18_2011_640_MOESM2_ESM.pdf]
